# Supplementary material for: One-step visualization of natural cell activities in non-labeled living spheroids
Source: PubMed Central journal article supplement (PMC8795241; doi:10.1038/s41598-022-05347-z), 2022-01-27
Supplement: 41598_2022_5347_MOESM1_ESM.pdf [file 41598_2022_5347_MOESM1_ESM.pdf]

## Extended Data Figure 1

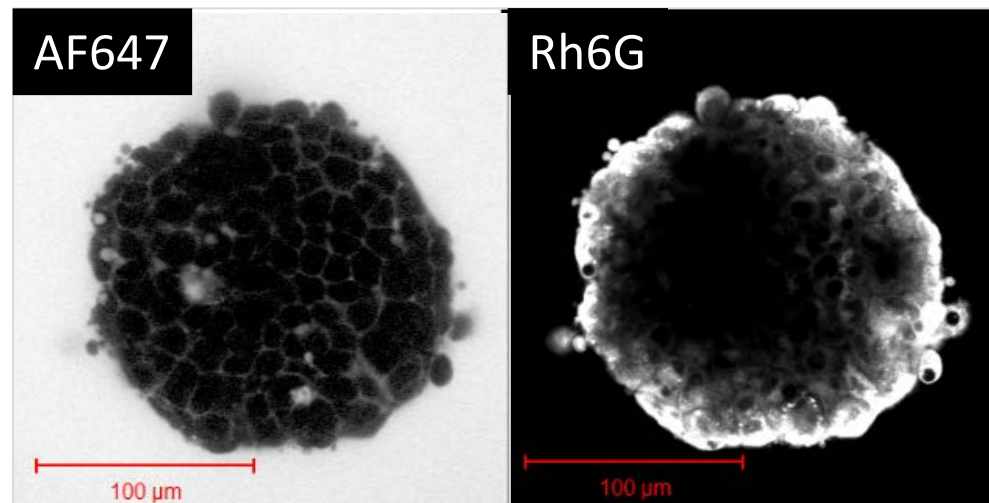

Extended Data Figure 1. The hydrophobicity of the fluorescent dye affects the inflow diffusion rate of the dye into the target spheroid. Dual-color confocal microscopy was performed for HepG2 spheroid NCI using the hydrophilic fluorescent dye AF647 (left) and the hydrophilic fluorescent dye Rhodamine 6G (Rh6G, right). One hour after the addition of the two dyes, compared to AF647, Rh6G fluorescence was observed with marked accumulation only in peripheral cells but little in the core region. Bar; 100 μm. The images were prepared by ZEN software (Zeiss, Jena, Germany).

## Extended Data Figure 2

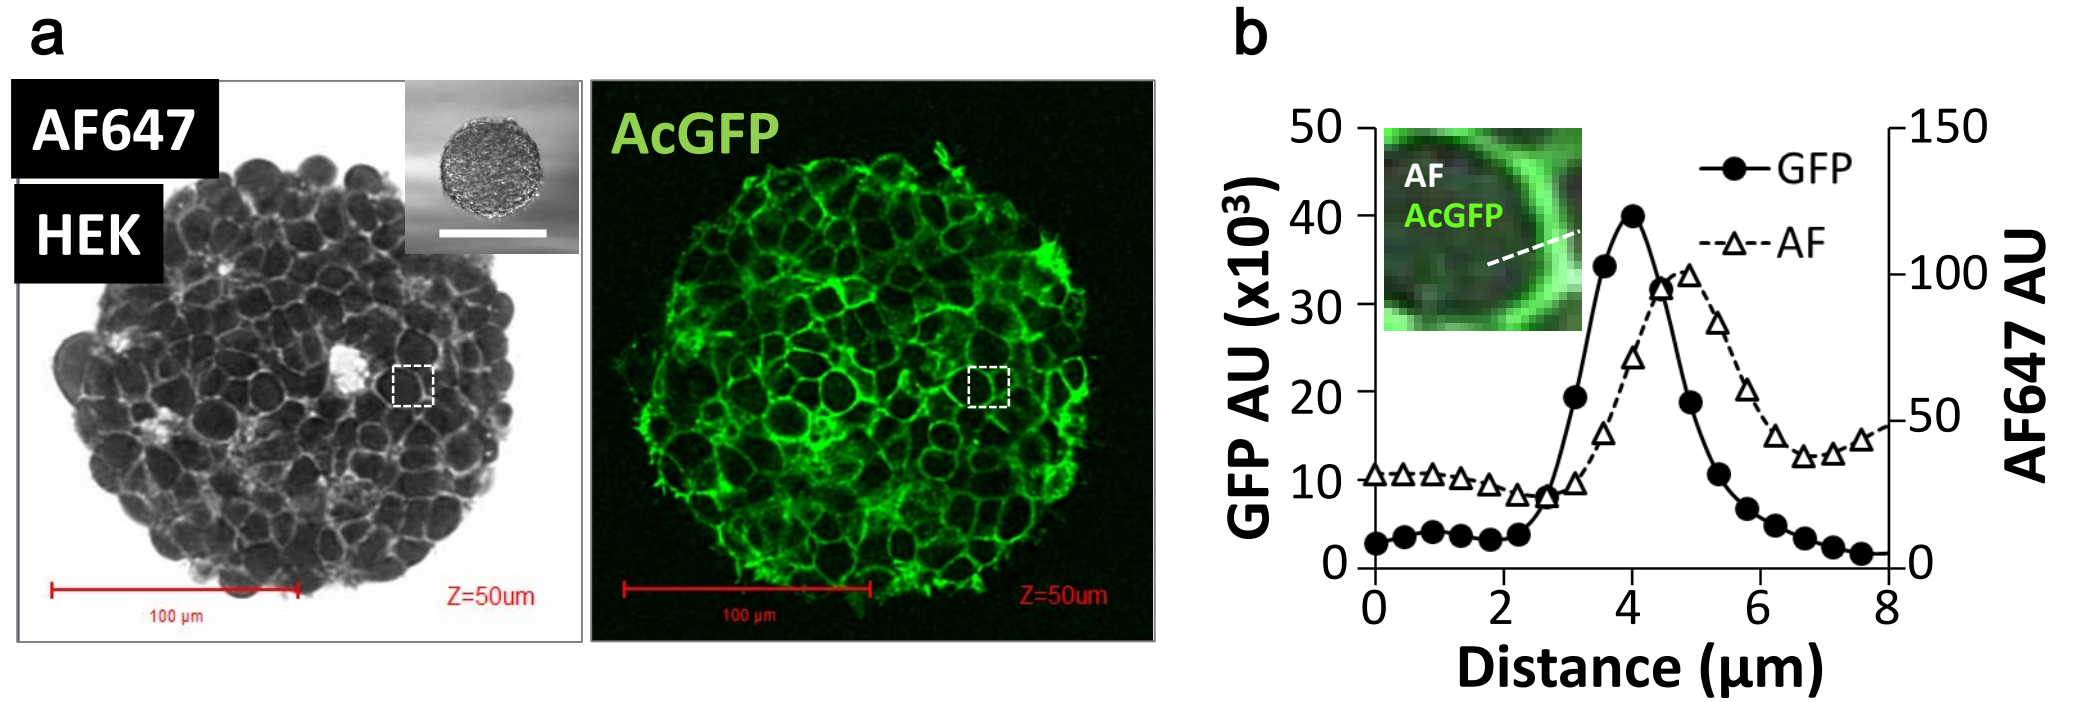

Extended Data Figure 2. NCI accurately visualizes the intercellular space of the spheroid. (a) A dual-color confocal image of a representative HEK293T (HEK) spheroid with transient expression of plasma membrane-targeting AcGFP in the cytosol. NCI with AF647 (left) and AcGFP images (right). Bar: 100  $\mu\text{m}$ . Dashed rectangle: enlarged area in the inset (b). Inset: bright field. Bar: 200  $\mu\text{m}$ . (b) Merged histograms of AcGFP (solid circles) and AF647 (blank triangles) fluorescence intensity along the dashed line in the inset. Inset: Merged image of the indicated dashed square in each image in (a). Square size: 16  $\times$  16  $\mu\text{m}$ . The AcGFP signal (green: intracellular side of the plasma membrane) was located beneath the AF647 signal (white: intercellular). The images were prepared by ZEN software.

## Extended Data Figure 3

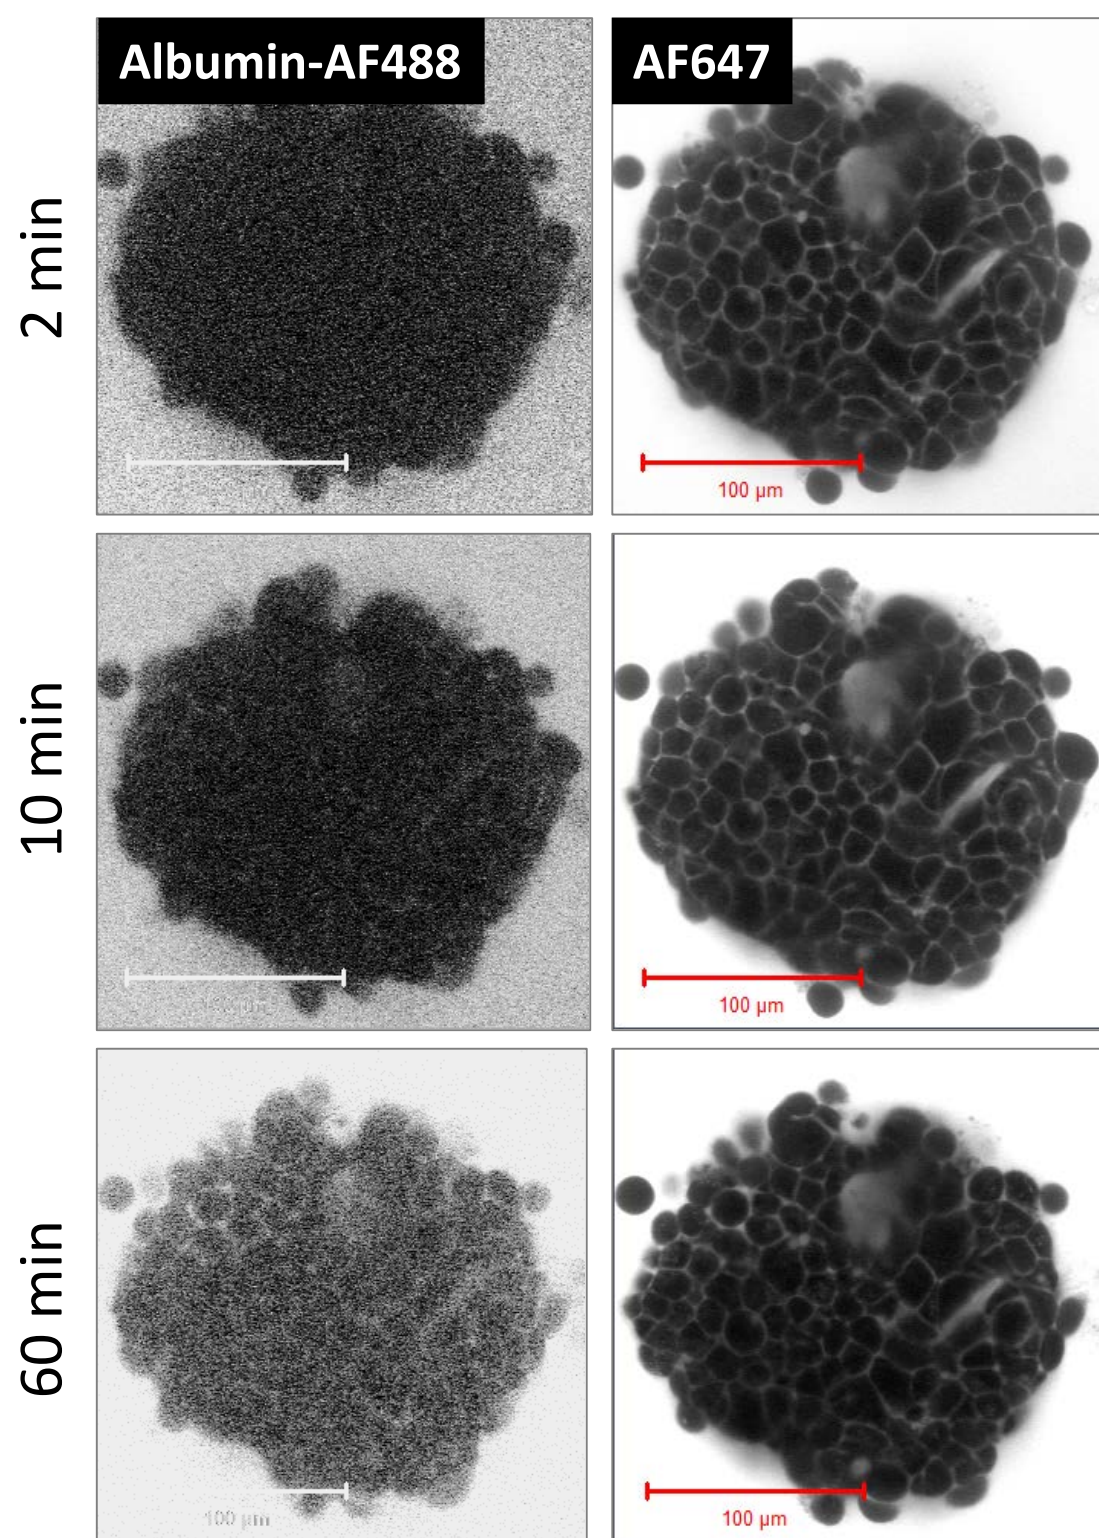

Extended Data Figure 3. The molecular weight of the dye can affect the inflow diffusion rate into the core region of the target spheroids. AF488-conjugated albumin was added to the medium of HepG2 spheroids together with AF647. Dual-color confocal imaging was performed at the same z position of the spheroid over a time course of 2, 10, and 60 min after the addition of dye. Higher molecular weight of dye yielded slower diffusion rates. Bar: 100 μm. The images were prepared by ZEN software.



## Extended Data Figure 4

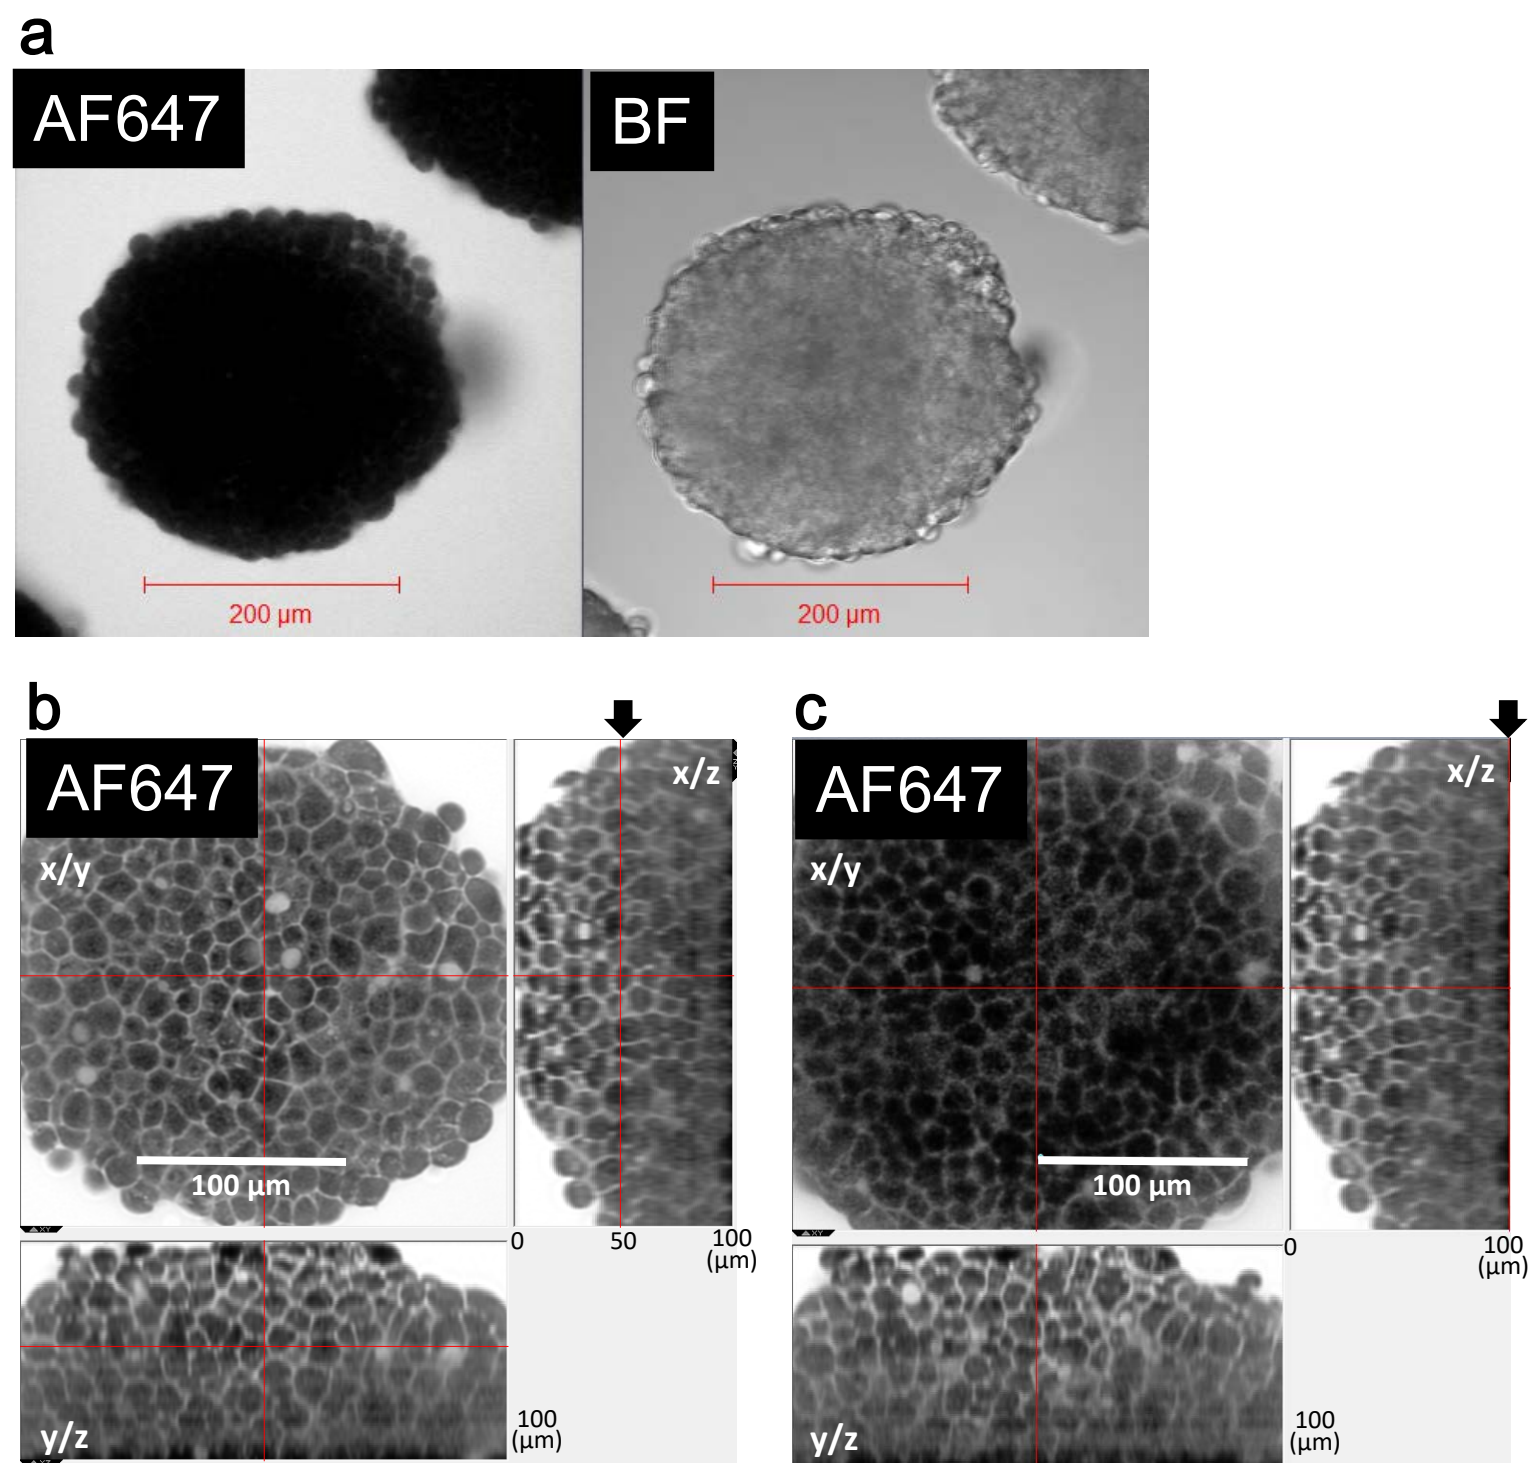

Extended Data Figure 4. NCI visualizes the cells in the deep core region of HepG2 spheroids. (a) Low-magnification image of the HepG2 spheroid acquired by NCI (left: AF647) and bright field (right: BF). (b, c) Confocal images of the same spheroid in (a) at (b) 50 μm and (c) 100 μm distance from the adhesion plane with the orthogonal images. Bar: 100 μm. Arrow: z position of the x/y plane. Individual cells can be identified by the separation of fluorescent signals in the intercellular space. The images were prepared by ZEN software.

## Extended Data Figure 5

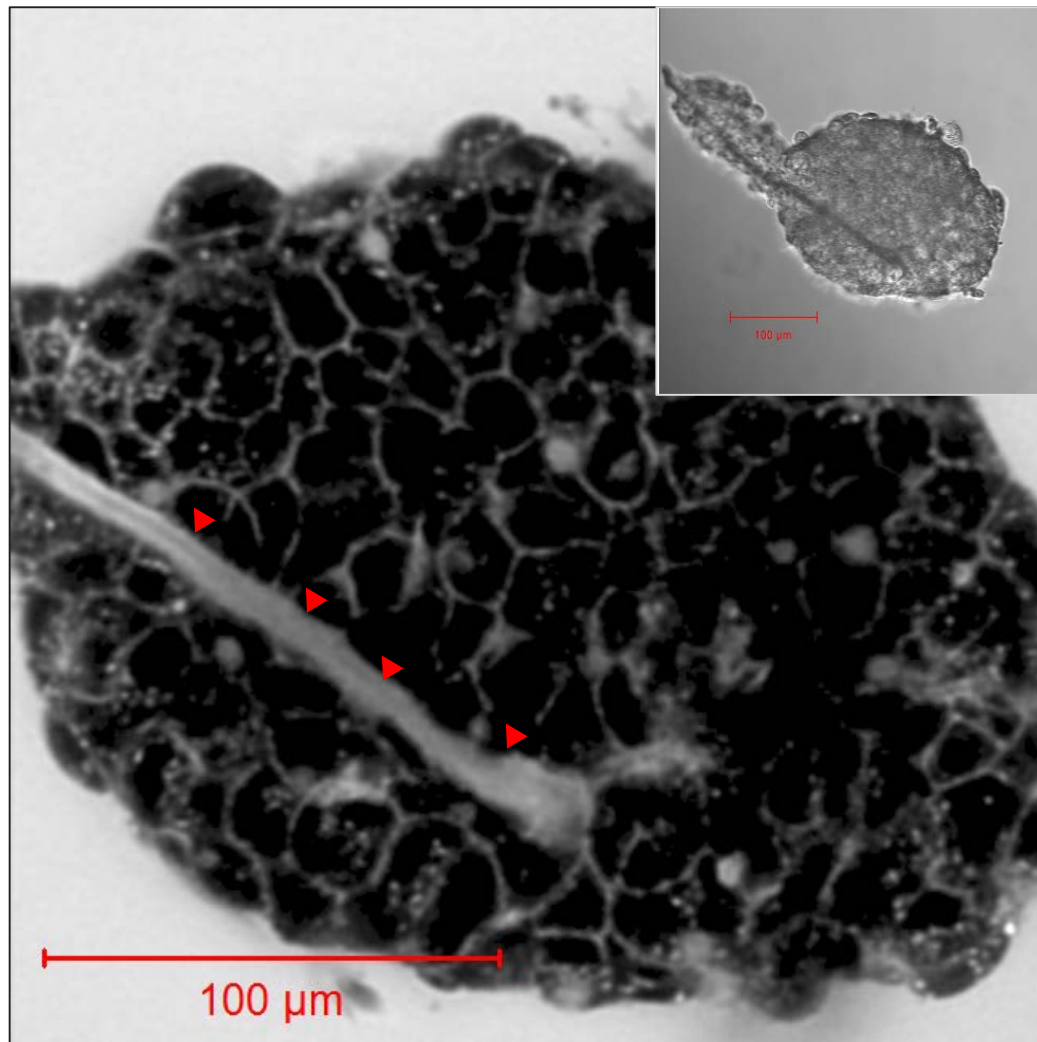

Extended Data Figure 5. NCI can visualize non-cellular insoluble components in spheroids. Representative NCI image of day 5 HepG2 spheroid that embeds insoluble filament component penetrating the dye (arrowhead), which might have originated from debris in the medium. Scale bar: 100  $\mu\text{m}$ . Inset: Low-magnitude image of the spheroid in the bright field. Bar: 100  $\mu\text{m}$ . The images were prepared by ZEN software.

## Extended Data Figure 6

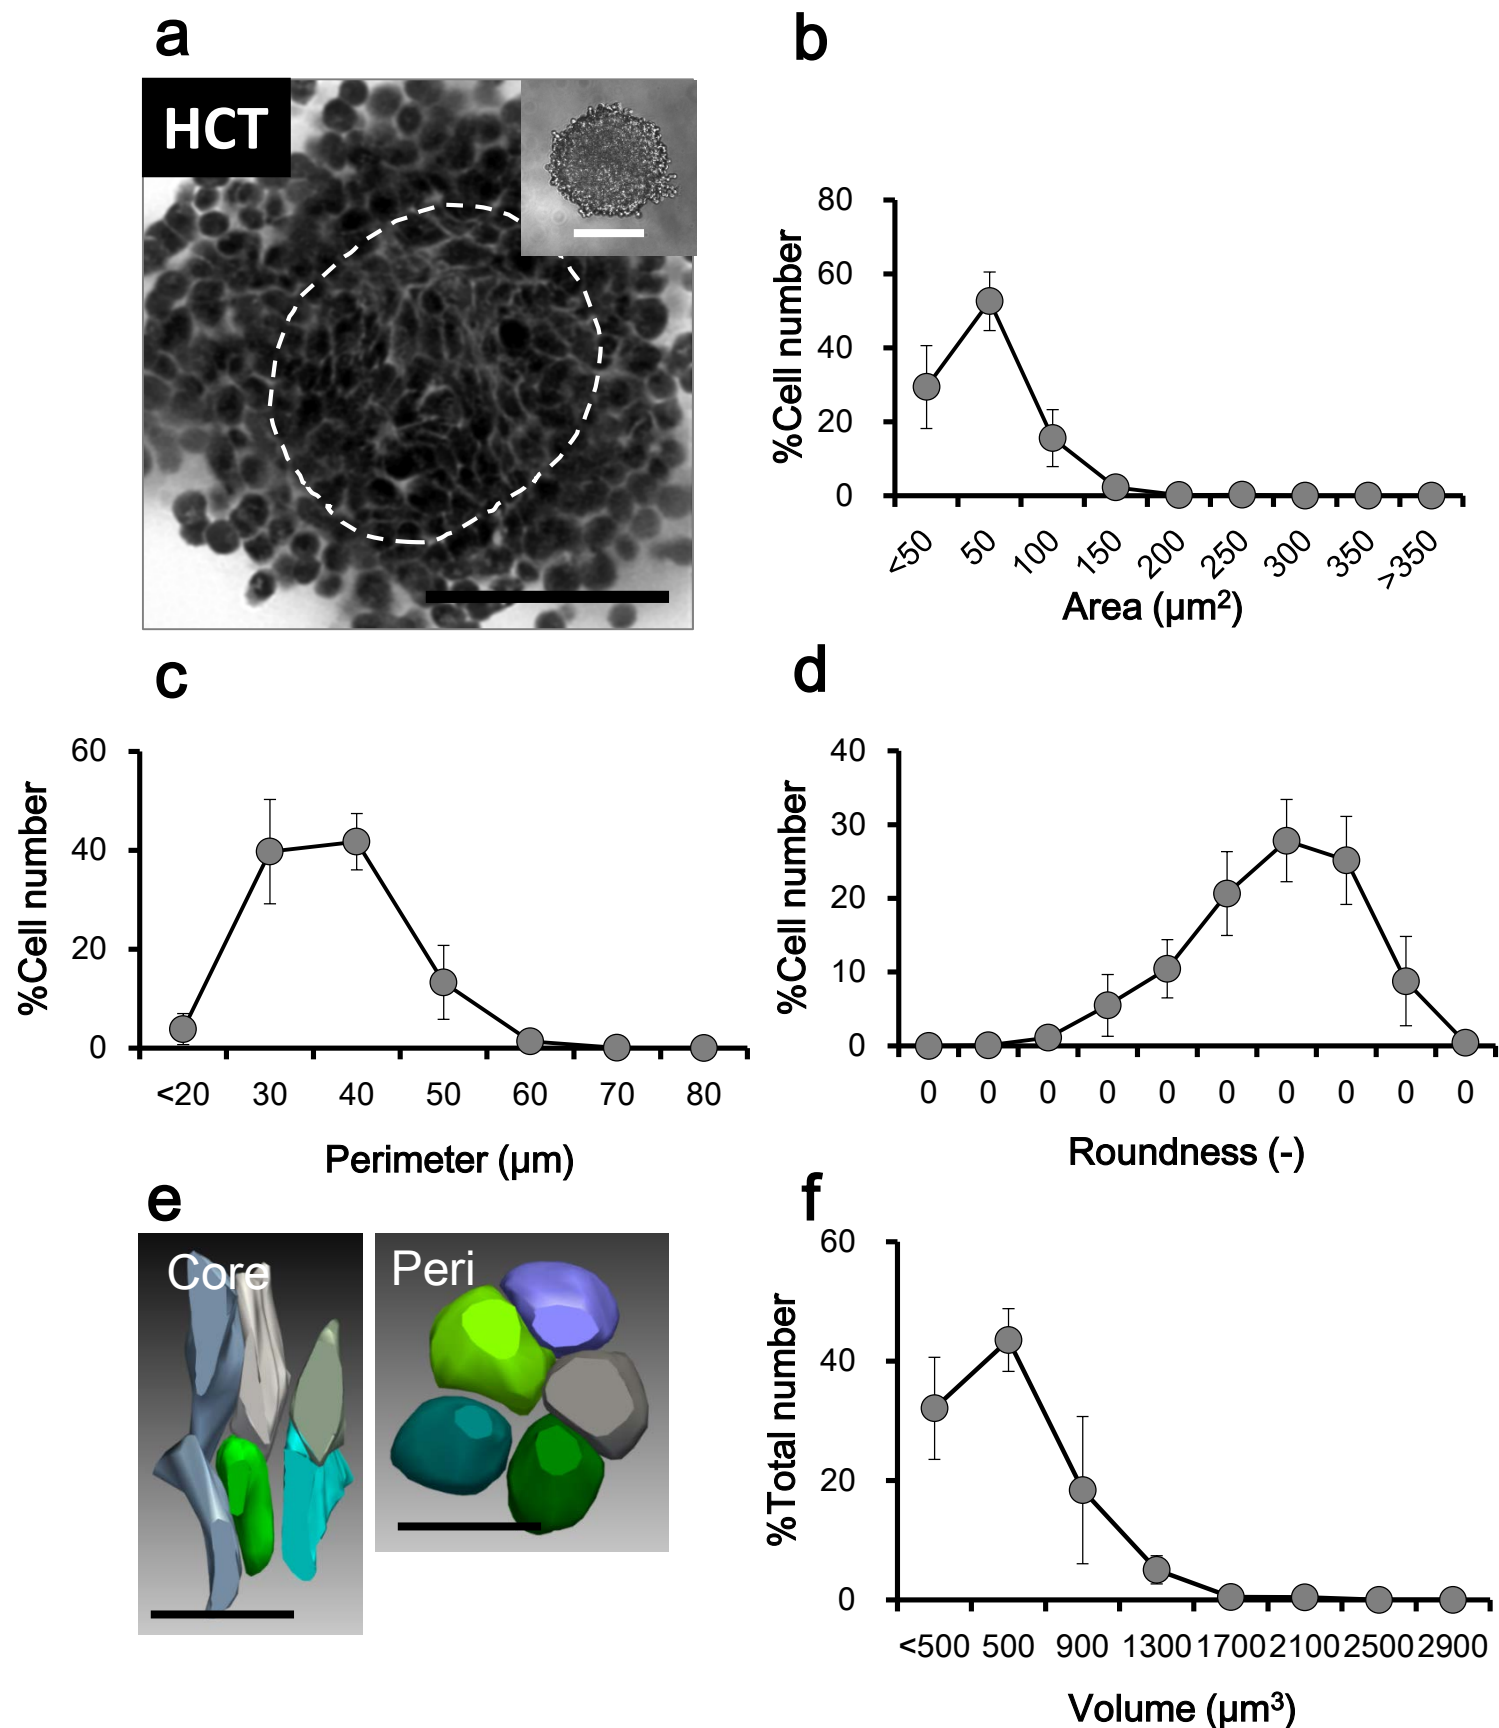

Extended Data Figure 6. NCI of a colon cancer-delivered cell line, HCT-116 (HCT). (a) Representative NCI image of HCT spheroids on day 5 of culture. The dashed line indicates the boundary between the inner tight and outer rough-cell-packaging areas. Bar: 100  $\mu\text{m}$ . Inset: Bright fields. Bar: 200  $\mu\text{m}$ . (b-d) Histograms of the individual cellular contours in the spheroid confocal images analyzed by the (b) area, (c) perimeter, and (d) roundness. N = 4. (e) Representative images of the reconstructed 3D structures of individual core cells in HCT spheroids. Each cell is indicated by a different color. Core: core cells; Peri: peripheral cells in (a). (f) Volumetric histogram of the spheroid core cells measured in the same way as in Figure 1i. N = 3. The images of (a) were prepared by ZEN software, and the structural parameters (b-d), 3D reconstruction of (e) and individual cell volumes of (f) were calculated by NeuroLucida (MBF Bioscience, Williston, VT, US).



# Extended Data Figure 7

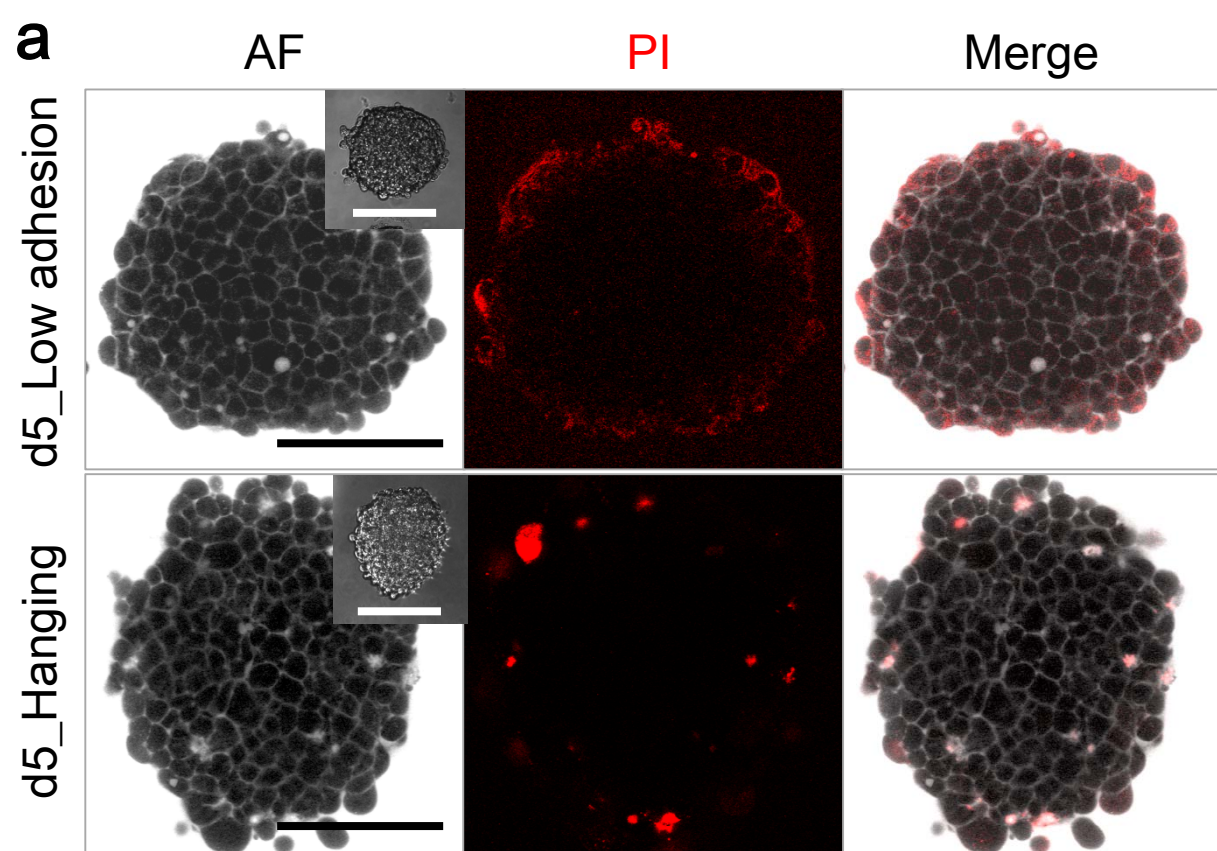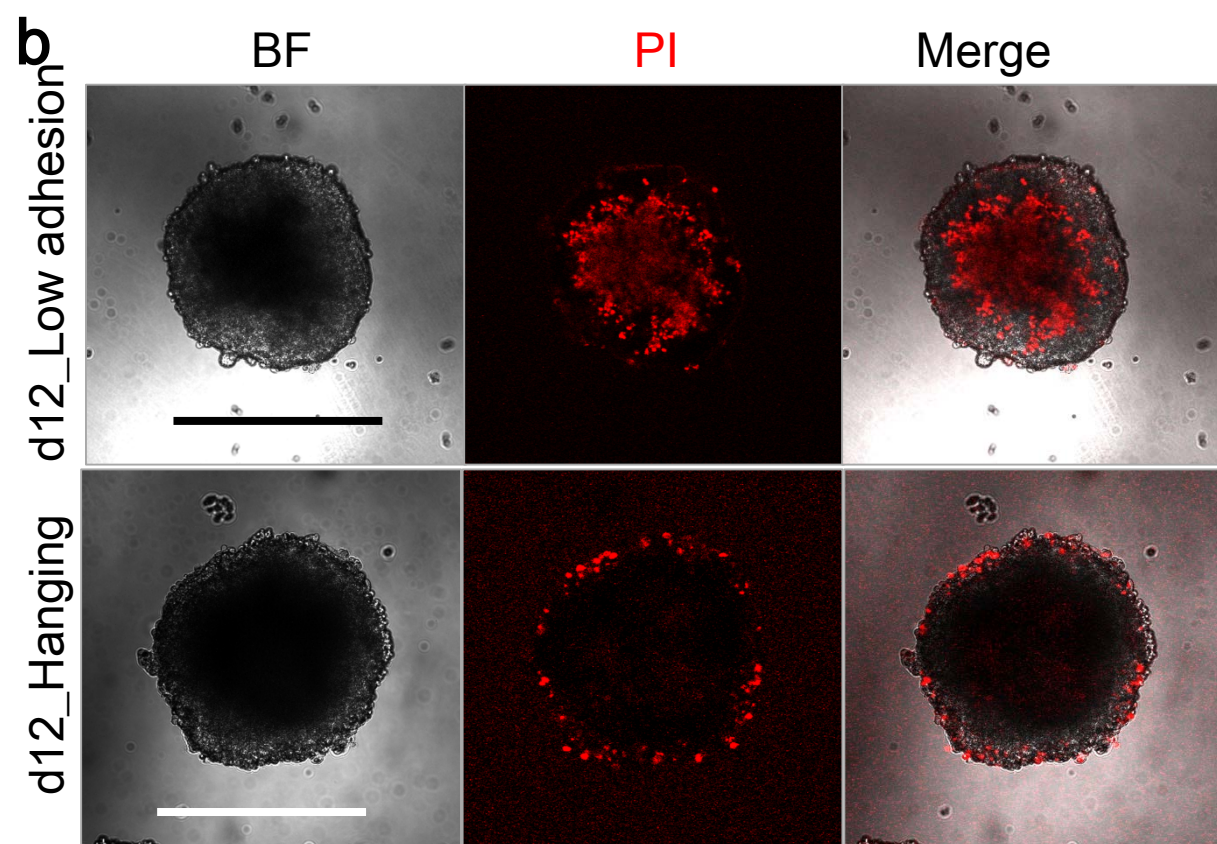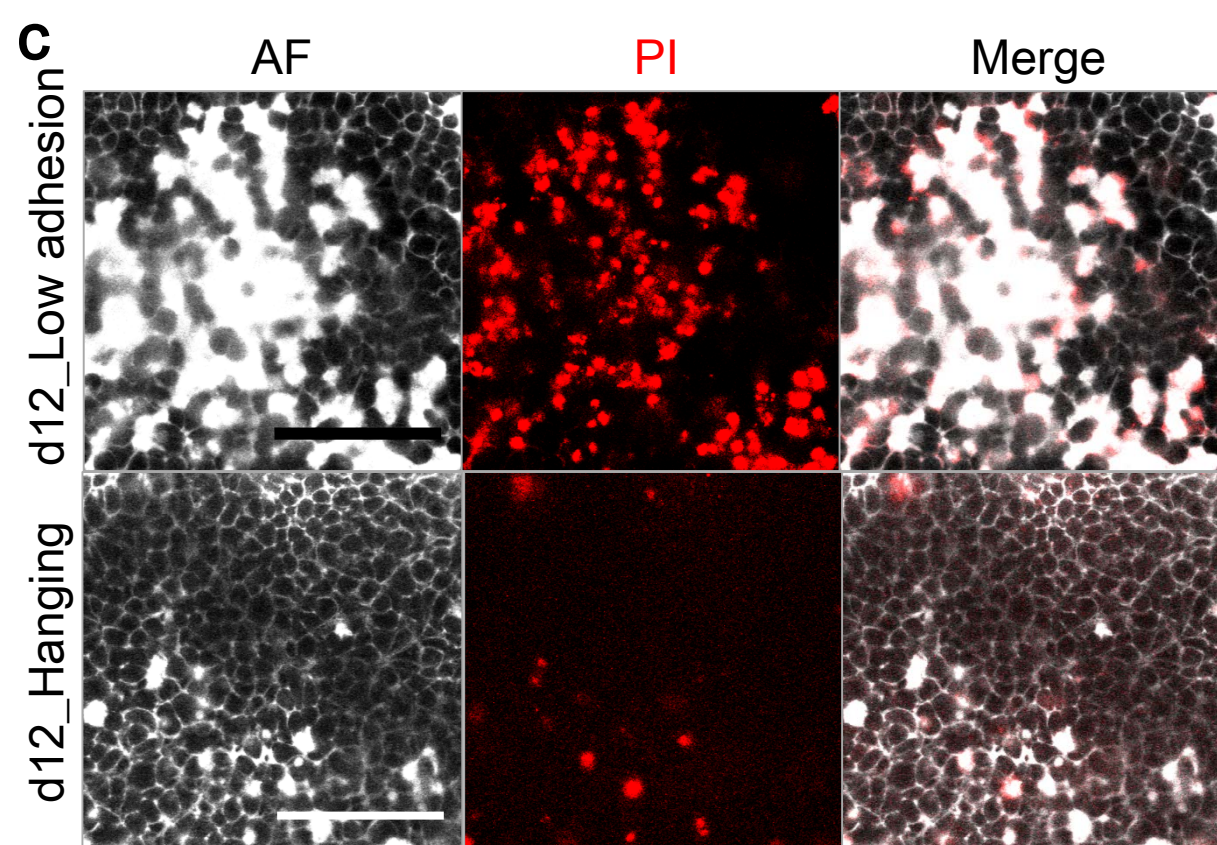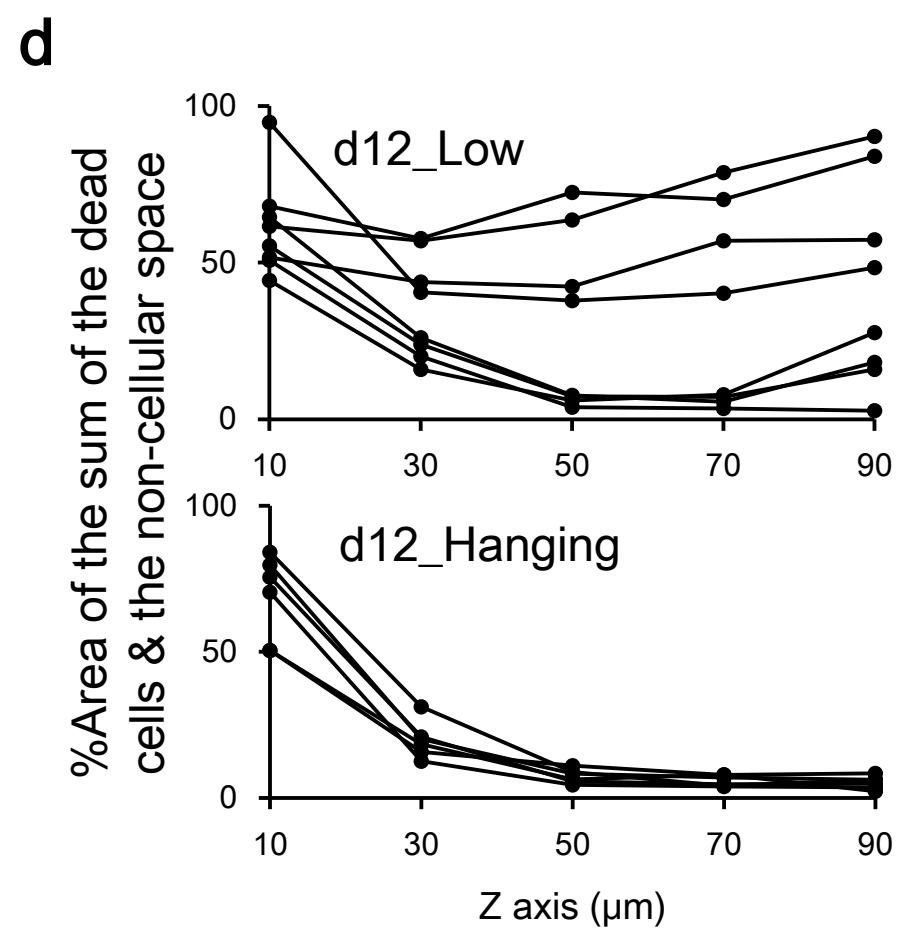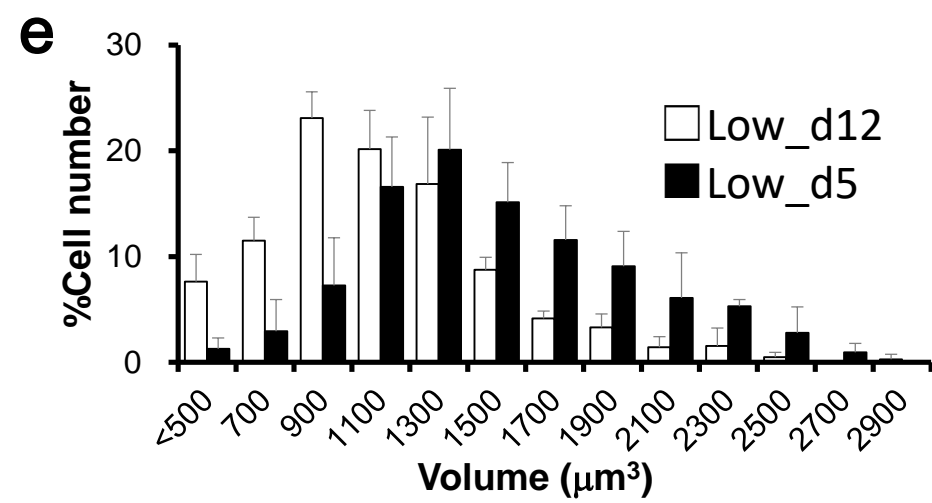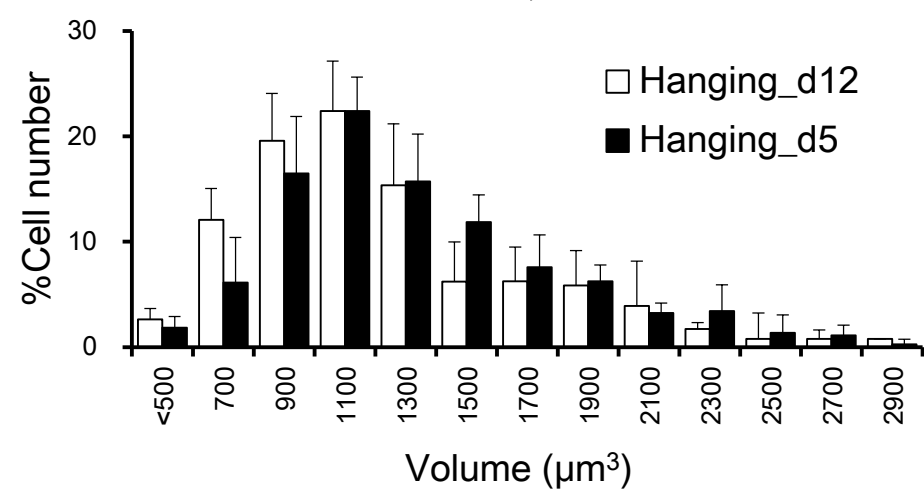



Extended Data Figure 7. NCI shows the difference in structural characteristics and viability of two spheroids cultured under different conditions. (a) HepG2 spheroids cultured for 5 days in a low-adhesion culture plate (upper) and by hanging drop method (lower) visualized by NCI (left column), propidium iodide (PI, middle), and merged (right). Bar: 100  $\mu\text{m}$ . A slight difference was observed between the two spheroids. (b) HepG2 spheroids cultured under the same conditions as in (a) for 12 days. Bright field image (left), confocal image with PI (middle), and merged (right). Scale bar: 500  $\mu\text{m}$ . Clear PI accumulation, which may indicate cell death, was observed in the spheroid core region, which was cultured using a low-adhesion culture plate. (c) Confocal image of the core region of spheroids (b) 100  $\mu\text{m}$  above the adhesion plane. NCI (left column), PI (middle), and merged (right). Scale bar: 100  $\mu\text{m}$ . (d) The content of the area of the sum of dead cells and non-cellular space against the entire scanned area aligned along the z-axis from the adhesion plane to 90  $\mu\text{m}$ . Upper: low-adhesion plate. N = 8. Lower: hanging drop method. N = 6. Each line indicates individual spheroid data. (e) Volumetric histograms of individual core cells of HepG2 spheroids cultured in the low-adhesion culture plate (upper panel) and by hanging drop method (lower panel). The five-day culture data are shown in the solid column, and 12 day culture data are shown in the blank column. The low-adhesion culture plate showed a peak shift in the cell volume histogram. The images of (a-c) were prepared by ZEN software, and calculation of the fluorescence intensity in (d) were by Fiji software (<https://imagej.net/Fiji>). The volume of the individual cells of (e) were calculated by Neurolucida.



# Extended Data Figure 8

**a**

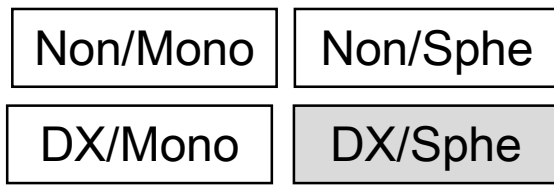

mRNA

- > Library (adaptor ligation)
- > PCR
- > QC
- > Seq (illumina HiSeq6000)
- > Mapping (Human genome: TopHat2)
- > Exp. Quantification (HTSeq)
- > Dif. Exp. Anal. (DESeq)
- > Norm. (DESeq)
- > FDR est. (BH)
- > GO Enrichment

**b**

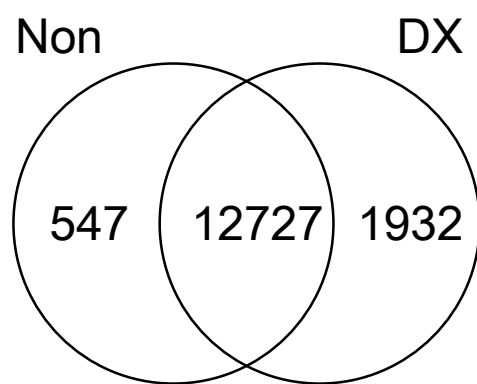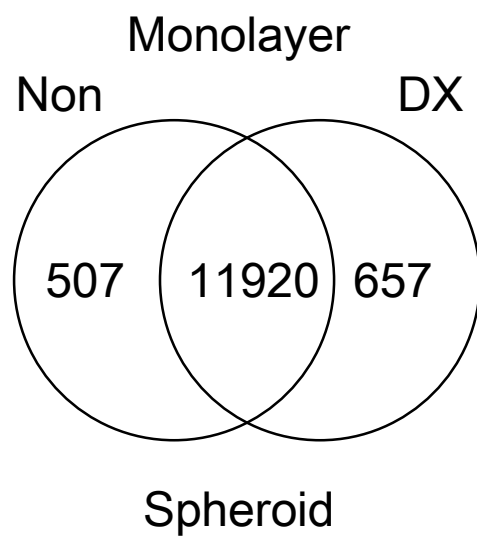

**c**

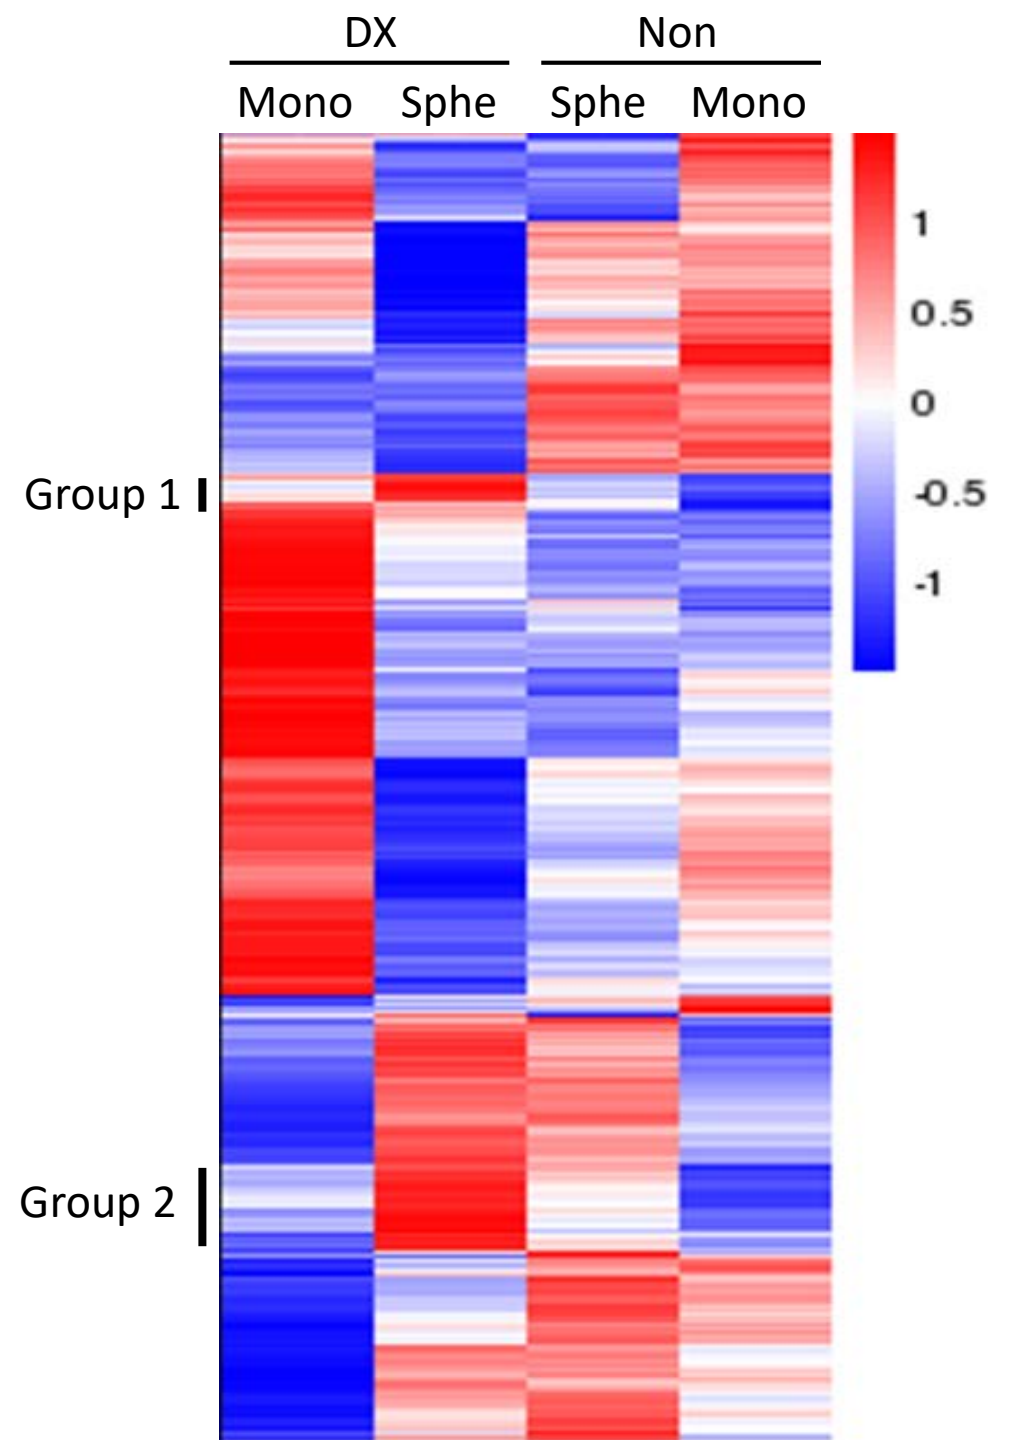

**d**

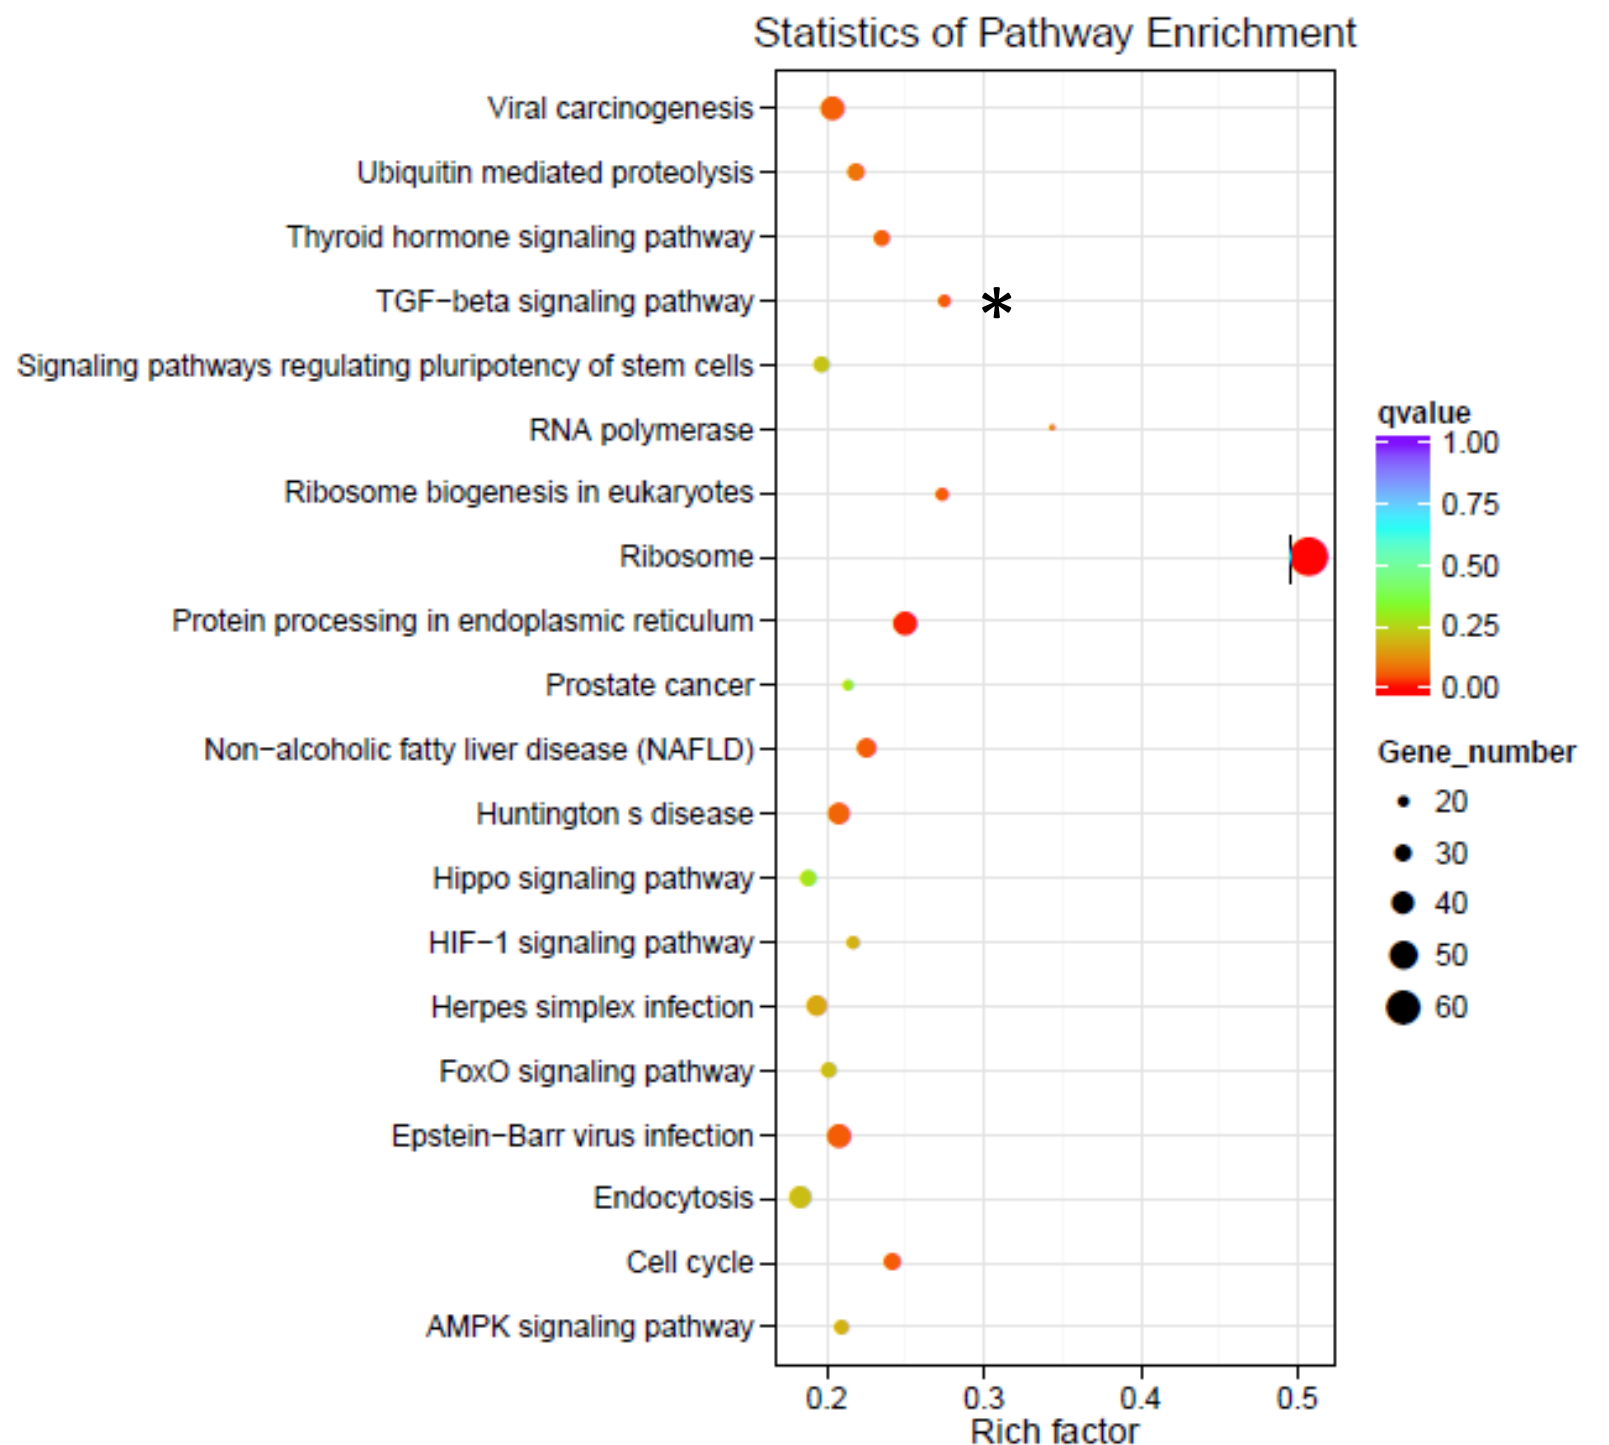

Extended Data Figure 8. Transcriptomic analysis of HepG2 cells under various culture conditions. (a) Schema of transcriptomic analysis. The four conditions in HepG2 cells cultured with monolayer (Mono) or spheroid (Sphe) with/without DX were compared. QC, quality control; FDR, false discovery rate; BH, Benjamini –Hochberg. (b) Venn diagrams representing the number of unique and common genes between the two RNA-seq samples. (c) FPKM cluster analysis (heat map) using the  $\log_{10}(\text{FPKM}+1)$  value. The color range from red to blue represents the  $\log_{10}(\text{FPKM}+1)$  value from large to small. Overall, 3,795 of 12,427 genes analyzed were found to be differentially expressed after multiple testing corrections (FDR estimation BH,  $<0.05$ ). The upregulated gene clusters in DX-treated spheroids were named Group 1 (84 genes) and Group 2 (126 genes), and the list is shown in Extended Data Figure 9 (Group 1) and 10 (Group 2). (d) KEGG enrichment scatter plot of DX enhancement in spheroids. Dot size represents the number of different genes, and color indicates the q-value. Asterisk: TGF- $\beta$  signaling pathway.

## Extended Data Figure 9

| Gene ID         | Gene Name                                                                                   |
|-----------------|---------------------------------------------------------------------------------------------|
| ENSG00000137509 | prolylcarboxypeptidase(PRCP)                                                                |
| ENSG00000089063 | transmembrane protein 230(TM230)                                                            |
| ENSG00000156467 | ubiquinol-cytochrome c reductase binding protein(UQCRB)                                     |
| ENSG00000105438 | KDEL endoplasmic reticulum protein retention receptor 1(KDEL1)                              |
| ENSG00000127184 | microRNA 3607(MIR3607)                                                                      |
| ENSG00000179222 | MAGE family member D1(MAGED1)                                                               |
| ENSG00000099624 | ATP synthase, H+ transporting, mitochondrial F1 complex, delta subunit(ATP5D)               |
| ENSG00000177600 | ribosomal protein lateral stalk subunit P2(RPLP2)                                           |
| ENSG00000065978 | Y-box binding protein 1(YBX1)                                                               |
| ENSG00000139644 | transmembrane BAX inhibitor motif containing 6(TMBIM6)                                      |
| ENSG00000111275 | aldehyde dehydrogenase 2 family (mitochondrial)(ALDH2)                                      |
| ENSG00000166794 | peptidylprolyl isomerase B(PPIB)                                                            |
| ENSG00000142541 | ribosomal protein L13a(RPL13A)                                                              |
| ENSG00000167004 | protein disulfide isomerase family A member 3(PDIA3)                                        |
| ENSG00000170889 | ribosomal protein S9(RPS9)                                                                  |
| ENSG00000101439 | cystatin C(CST3)                                                                            |
| ENSG00000163041 | H3 histone family member 3A(H3F3A)                                                          |
| ENSG00000169100 | solute carrier family 25 member 6(SLC25A6)                                                  |
| ENSG00000105193 | ribosomal protein S16(RPS16)                                                                |
| ENSG00000160014 | calmodulin 3(CALM3)                                                                         |
| ENSG00000109472 | carboxypeptidase E(CPE)                                                                     |
| ENSG00000130707 | argininosuccinate synthase 1(ASS1)                                                          |
| ENSG00000167526 | ribosomal protein L13(RPL13)                                                                |
| ENSG00000143870 | protein disulfide isomerase family A member 6(PDIA6)                                        |
| ENSG00000166710 | beta-2-microglobulin(B2M)                                                                   |
| ENSG00000160213 | cystatin B(CSTB)                                                                            |
| ENSG00000155368 | diazepam binding inhibitor, acyl-CoA binding protein(DBI)                                   |
| ENSG00000161944 | asialoglycoprotein receptor 2(ASGR2)                                                        |
| ENSG00000138207 | retinol binding protein 4(RBP4)                                                             |
| ENSG00000197249 | serpin family A member 1(SERPINA1)                                                          |
| ENSG00000198931 | adenine phosphoribosyltransferase(APRT)                                                     |
| ENSG00000170540 | ADP ribosylation factor like GTPase 6 interacting protein 1(ARL6IP1)                        |
| ENSG00000115268 | ribosomal protein S15(RPS15)                                                                |
| ENSG00000110492 | midkine (neurite growth-promoting factor 2)(MDK)                                            |
| ENSG00000136942 | ribosomal protein L35(RPL35)                                                                |
| ENSG00000132386 | serpin family F member 1(SERPINF1)                                                          |
| ENSG00000173457 | protein phosphatase 1 regulatory inhibitor subunit 14B(PPP1R14B)                            |
| ENSG00000233927 | ribosomal protein S28(RPS28)                                                                |
| ENSG00000120885 | microRNA 6843(MIR6843)                                                                      |
| ENSG00000221983 | ubiquitin A-52 residue ribosomal protein fusion product 1(UBA52)                            |
| ENSG00000162244 | ribosomal protein L29(RPL29)                                                                |
| ENSG00000142534 | ribosomal protein S11(RPS11)                                                                |
| ENSG00000109861 | cathepsin C(CTSC)                                                                           |
| ENSG00000149273 | ribosomal protein S3(RPS3)                                                                  |
| ENSG00000153574 | ribose 5-phosphate isomerase A(RPIA)                                                        |
| ENSG00000065154 | ornithine aminotransferase(OAT)                                                             |
| ENSG00000112306 | ribosomal protein S12(RPS12)                                                                |
| ENSG00000136156 | integral membrane protein 2B(IT2B)                                                          |
| ENSG00000135744 | angiotensinogen(AGT)                                                                        |
| ENSG00000158104 | 4-hydroxyphenylpyruvate dioxygenase(HPD)                                                    |
| ENSG00000131143 | cytochrome c oxidase subunit 41(COX41)                                                      |
| ENSG00000117632 | microRNA 3917(MIR3917)                                                                      |
| ENSG00000135940 | cytochrome c oxidase subunit 5B(COX5B)                                                      |
| ENSG00000118137 | apolipoprotein A1(APOA1)                                                                    |
| ENSG00000116221 | mitochondrial ribosomal protein L37(MRPL37)                                                 |
| ENSG00000125827 | thioredoxin related transmembrane protein 4(TM4)                                            |
| ENSG00000159199 | ATP synthase, H+ transporting, mitochondrial Fo complex subunit C1 (subunit 9)(ATP5G1)      |
| ENSG00000186468 | ribosomal protein S23(RPS23)                                                                |
| ENSG00000063177 | ribosomal protein L18(RPL18)                                                                |
| ENSG00000140988 | ribosomal protein S2(RPS2)                                                                  |
| ENSG00000147257 | glypican 3(GPC3)                                                                            |
| ENSG00000129824 | ribosomal protein S4, Y-linked 1(RPS4Y1)                                                    |
| ENSG00000147255 | immunoglobulin superfamily member 1(IGSF1)                                                  |
| ENSG00000105372 | ribosomal protein S19(RPS19)                                                                |
| ENSG00000124299 | peptidase D(PEPD)                                                                           |
| ENSG00000161203 | adaptor related protein complex 2 mu 1 subunit(AP2M1)                                       |
| ENSG00000093010 | microRNA 4761(MIR4761)                                                                      |
| ENSG00000137818 | ribosomal protein lateral stalk subunit P1(RPLP1)                                           |
| ENSG00000178445 | glycine decarboxylase(GLDC)                                                                 |
| ENSG00000163902 | ribophorin I(RPN1)                                                                          |
| ENSG00000155660 | protein disulfide isomerase family A member 4(PDIA4)                                        |
| ENSG00000083845 | ribosomal protein S5(RPS5)                                                                  |
| ENSG00000169174 | proprotein convertase subtilisin/kexin type 9(PCSK9)                                        |
| ENSG00000243147 | mitochondrial ribosomal protein L33(MRPL33)                                                 |
| ENSG00000244038 | dolichyl-diphosphooligosaccharide--protein glycosyltransferase non-catalytic subunit(DDOST) |
| ENSG00000177556 | antioxidant 1 copper chaperone(ATOX1)                                                       |
| ENSG00000175899 | alpha-2-macroglobulin(A2M)                                                                  |
| ENSG00000167996 | ferritin heavy chain 1(FTH1)                                                                |
| ENSG00000206503 | major histocompatibility complex, class I, A(HLA-A)                                         |
| ENSG00000125995 | reactive oxygen species modulator 1(ROMO1)                                                  |
| ENSG00000101444 | adenosylhomocysteinase(AHCY)                                                                |
| ENSG00000123131 | peroxiredoxin 4(PRX4)                                                                       |
| ENSG00000149547 | EI24, autophagy associated transmembrane protein(EI24)                                      |
| ENSG00000105640 | ribosomal protein L18a(RPL18A)                                                              |

Extended Data Figure 9. The contents of Group 1 of the heat map shown in Extended Data Fig. 8b.





# Extended Data Figure 11

|          | Gene     | FPKM     |         |          |         |
|----------|----------|----------|---------|----------|---------|
|          |          | Non_Sphe | Dx_Sphe | Non_Mono | Dx_Mono |
| Integrin | ITGA1    | 13       | 16      | 19       | 19      |
|          | ITGA2    | 10       | 4       | 22       | 10      |
|          | ITGA2B   | 0        | 1       | 0        | 13      |
|          | ITGA3    | 1        | 1       | 3        | 6       |
|          | ITGA4    | 0        | 0       | 0        | 0       |
|          | ITGA5    | 0        | 0       | 0        | 1       |
|          | ITGA6    | 33       | 27      | 26       | 24      |
|          | ITGA7    | 2        | 1       | 3        | 9       |
|          | ITGA8    | 0        | 0       | 0        | 0       |
|          | ITGA9    | 0        | 0       | 0        | 1       |
|          | ITGA10   | 0        | 0       | 2        | 2       |
|          | ITGA11   | 0        | 0       | 0        | 0       |
|          | ITGAD    | 0        | 0       | 0        | 0       |
|          | ITGAE    | 22       | 28      | 20       | 18      |
|          | ITGAL    | 7        | 5       | 10       | 7       |
|          | ITGAM    | 0        | 0       | 0        | 6       |
|          | ITGAV    | 47       | 50      | 85       | 55      |
|          | ITGAX    | 0        | 0       | 0        | 0       |
|          | ITGB1    | 328      | 481     | 389      | 378     |
|          | ITGB1BP1 | 80       | 85      | 53       | 52      |
|          | ITGB1BP2 | 0        | 0       | 1        | 0       |
|          | ITGB1P1  | 0        | 0       | 0        | 1       |
|          | ITGB2    | 6        | 12      | 20       | 20      |
|          | ITGB3    | 0        | 0       | 0        | 0       |
|          | ITGB3    | 0        | 0       | 0        | 0       |
|          | ITGB3BP  | 24       | 24      | 18       | 8       |
|          | ITGB4    | 2        | 2       | 4        | 13      |
|          | ITGB5    | 69       | 82      | 142      | 130     |
| ITGB6    | 0        | 0        | 0       | 0        |         |
| ITGB7    | 1        | 0        | 1       | 3        |         |
| ITGB8    | 0        | 0        | 0       | 0        |         |
| ITGBL1   | 0        | 0        | 0       | 0        |         |

|              | Gene     | FPKM     |         |          |         |
|--------------|----------|----------|---------|----------|---------|
|              |          | Non_Sphe | Dx_Sphe | Non_Mono | Dx_Mono |
| Proteoglycan | CSPG4P4Y | 0        | 0       | 0        | 0       |
|              | CSPG4    | 0        | 0       | 0        | 1       |
|              | CSPG4P1Y | 0        | 0       | 0        | 0       |
|              | CSPG4P2Y | 0        | 0       | 0        | 0       |
|              | CSPG4P3Y | 0        | 0       | 0        | 0       |
|              | CSPG4P5  | 0        | 0       | 0        | 0       |
|              | CSPG5    | 0        | 1       | 0        | 5       |
|              | HAPLN1   | 0        | 0       | 0        | 0       |
|              | HAPLN2   | 0        | 0       | 0        | 3       |
|              | HAPLN3   | 0        | 0       | 0        | 0       |
|              | HAPLN4   | 0        | 0       | 0        | 0       |
|              | HSPG2    | 30       | 54      | 148      | 320     |
|              | IMPG1    | 0        | 0       | 0        | 0       |
|              | IMPG2    | 0        | 0       | 0        | 0       |
|              | IMPG2    | 0        | 0       | 0        | 0       |
|              | LEPRE1   | 61       | 96      | 120      | 178     |
|              | PRG2     | 0        | 0       | 0        | 0       |
|              | PRG3     | 0        | 0       | 0        | 0       |
|              | PRG4     | 0        | 0       | 0        | 0       |
|              | SPOCK1   | 0        | 0       | 0        | 0       |
|              | SPOCK2   | 34       | 55      | 192      | 311     |
|              | SPOCK3   | 0        | 0       | 0        | 0       |
|              | TSKU     | 42       | 5       | 44       | 50      |

|          | Gene    | FPKM     |         |          |         |
|----------|---------|----------|---------|----------|---------|
|          |         | Non_Sphe | Dx_Sphe | Non_Mono | Dx_Mono |
| Collagen | COL1A1  | 0        | 0       | 1        | 3       |
|          | COL1A2  | 0        | 0       | 0        | 1       |
|          | COL2A1  | 171      | 312     | 157      | 288     |
|          | COL4A1  | 0        | 0       | 0        | 0       |
|          | COL4A2  | 1        | 0       | 1        | 1       |
|          | COL4A3  | 0        | 0       | 0        | 0       |
|          | COL4A4  | 0        | 0       | 0        | 0       |
|          | COL4A5  | 1        | 1       | 0        | 1       |
|          | COL4A6  | 0        | 0       | 0        | 0       |
|          | COL5A1  | 0        | 1       | 1        | 1       |
|          | COL5A2  | 1        | 1       | 1        | 2       |
|          | COL5A3  | 0        | 0       | 0        | 0       |
|          | COL6A1  | 3        | 5       | 5        | 23      |
|          | COL6A2  | 0        | 0       | 0        | 2       |
|          | COL6A5  | 0        | 0       | 0        | 0       |
|          | COL6A6  | 0        | 0       | 0        | 0       |
|          | COL7A1  | 15       | 21      | 73       | 97      |
|          | COL8A1  | 0        | 0       | 0        | 0       |
|          | COL8A2  | 0        | 0       | 0        | 1       |
|          | COL9A1  | 0        | 0       | 0        | 1       |
|          | COL9A3  | 84       | 141     | 293      | 437     |
|          | COL9A2  | 12       | 16      | 45       | 76      |
|          | COL10A1 | 0        | 0       | 0        | 0       |
|          | COL11A1 | 0        | 0       | 0        | 0       |
|          | COL11A2 | 0        | 0       | 1        | 3       |
|          | COL12A1 | 0        | 0       | 0        | 0       |
|          | COL13A1 | 0        | 0       | 0        | 0       |
|          | COL14A1 | 0        | 0       | 0        | 1       |
|          | COL15A1 | 0        | 0       | 0        | 0       |
|          | COL16A1 | 7        | 8       | 7        | 11      |
|          | COL17A1 | 0        | 0       | 0        | 1       |
|          | COL18A1 | 55       | 100     | 175      | 200     |
|          | COL19A1 | 0        | 0       | 0        | 0       |
|          | COL20A1 | 0        | 0       | 0        | 3       |
|          | COL21A1 | 78       | 116     | 97       | 68      |
|          | COL22A1 | 0        | 0       | 0        | 0       |
|          | COL23A1 | 0        | 0       | 0        | 0       |
|          | COL24A1 | 0        | 0       | 0        | 0       |
|          | COL25A1 | 0        | 0       | 0        | 0       |
|          | COL27A1 | 55       | 57      | 144      | 248     |
| COL28A1  | 0       | 0        | 0       | 1        |         |

Extended Data Figure 11. Systematic comparison of the transcription mass (FPKM) of the ECM-related gene series expressed in HepG2 cells under several culture conditions. All data were obtained from RNA-seq results.

## Extended Data Figure 12

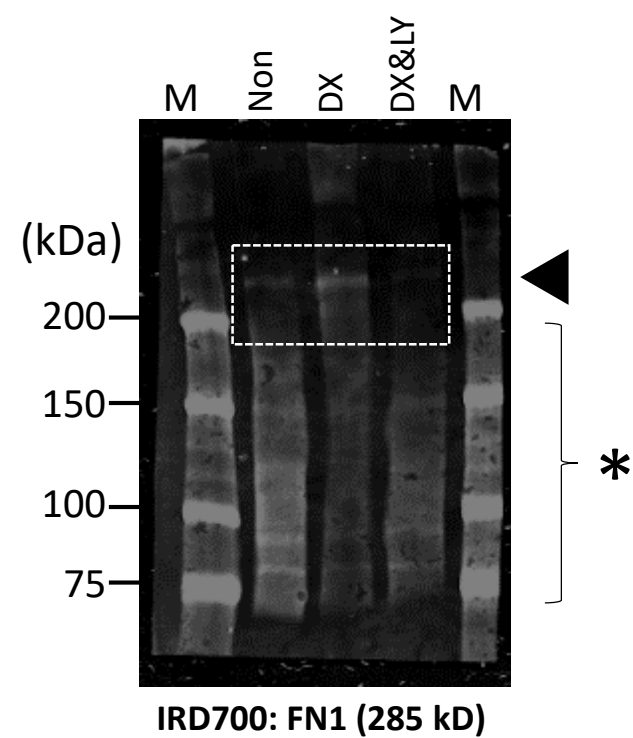

Extended Data Figure 12. The whole image of immunoblotting analysis of fibronectin expression shown in Fig. 4g. Arrowhead: non-disassembled FN (285 kDa). Asterisk: a putative disassembled FN. Dashed rectangle: area shown in Fig. 4g. The image was prepared by Odyssey system (LI-COR, Lincoln, NB, USA).



## Extended Data Figure 13

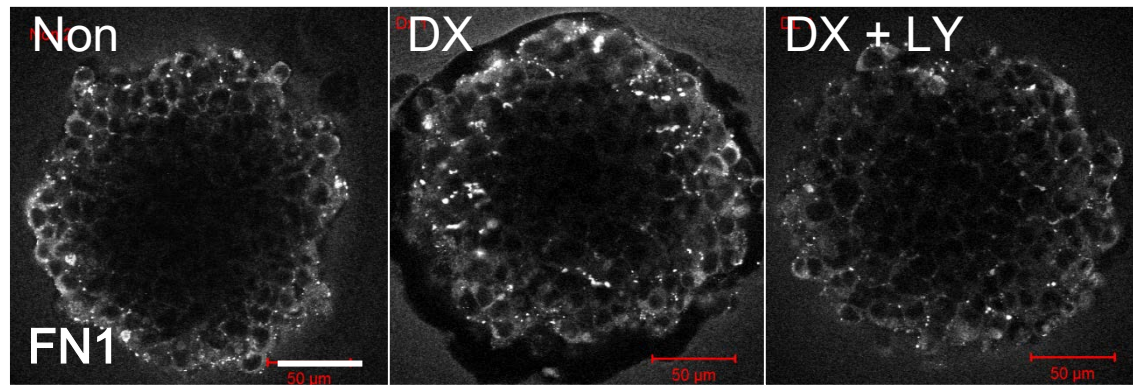

Extended Data Figure 13. Immunofluorescence of fibronectin in HepG2 spheroids after drug treatment. Day 5 HepG2 spheroids of non-treated or treated with DX or with DX and the TGFR inhibitor (LY) were embedded in the Smear Gell, fixed, permeabilized with detergent, and immunostained with rat anti-FN1 antibody and fluorescence-conjugated secondary antibody. Images were acquired using the confocal microscopy. Scale bar: 50  $\mu\text{m}$ . The images were prepared by ZEN software (Zeiss, Jena, Germany),
